# Supplementary material for: Intrahepatic cholestasis of pregnancy is associated with an increased risk of gestational diabetes and preeclampsia
Source: PubMed Central journal article supplement — Ann Transl Med. 2020 Dec;8(23):1574. doi: 10.21037/atm-20-4879 (PMC7791254; doi:10.21037/atm-20-4879), 2020-12
Supplement: atm-08-23-1574-dss.pdf [file atm-08-23-1574-dss.pdf]

## Data Sharing Statement

|                     |                                                                                                                                                    |                                                                                                                            |
|---------------------|----------------------------------------------------------------------------------------------------------------------------------------------------|----------------------------------------------------------------------------------------------------------------------------|
| <b>Article Info</b> | <a href="http://dx.doi.org/10.21037/atm-20-4879">http://dx.doi.org/10.21037/atm-20-4879</a>                                                        |                                                                                                                            |
| <b>Item</b>         | <b>Question</b>                                                                                                                                    | <b>Authors' Response<br/>(place "-" if not applicable)</b>                                                                 |
| 1                   | Would you like to share data collected for your study to others?                                                                                   | Yes                                                                                                                        |
| 2                   | If not, would you like to share the reason for your decision?                                                                                      | -                                                                                                                          |
| 3                   | What data in particular will be shared?                                                                                                            | The maternal and neonatal outcomes will be shared.                                                                         |
| 4                   | Any other documents will be share? Such as study protocol, statistical analysis plan, informed consent form, clinical study report, analytic code. | Statistical analysis plan will also be shared if requested.                                                                |
| 5                   | When will data availability begin?                                                                                                                 | From the publication date.                                                                                                 |
| 6                   | When will data availability end?                                                                                                                   | Two years within the publication date, since the diagnosis and treatment of ICP/GDM/preeclampsia may be updated over time. |
| 7                   | To whom will you share the data?                                                                                                                   | Gynecologic and obstetric doctors who are interested in the study.                                                         |
| 8                   | For what type of analysis or purpose?                                                                                                              | For analysis to evaluate the maternal and fetal outcomes of ICP .                                                          |
| 9                   | How or where can the data/documents be obtained?                                                                                                   | Emails could be sent to the address below to obtain the shared data: gaojingsong@pumch.cn                                  |
| 10                  | Any other restrictions?                                                                                                                            | We may balance the potential benefits and risks for each request and then provide the data that could be shared.           |
